# Supplementary material for: Boosting stability: a hierarchical approach for self-assembling peptide structures
Source: Royal Society of Chemistry journal article supplement (doi:10.1039/d4tb01545b), 2024-01-01
Supplement: d4tb01545b1.pdf [file d4tb01545b1.pdf]

Supporting Information

## Boosting stability: a hierarchical approach for self-assembling peptide structures

Denys Balandin, Natalia Szulc, Dominika Bystranowska, Marlena Gąsior-Głogowska, Roksana Kruszakin, Monika Szefczyk

| Content                                                                                                                                                                                                                                          | Page Number |
|--------------------------------------------------------------------------------------------------------------------------------------------------------------------------------------------------------------------------------------------------|-------------|
| <b>Table S1.</b> Sequences and formulas of the synthesized peptides.                                                                                                                                                                             | 1           |
| <b>Table S2.</b> Analytical data for the synthesized peptides.                                                                                                                                                                                   | 1           |
| <b>Figure S1.</b> A) Mass spectra and B) analytical HPLC chromatograms of the studied peptides.                                                                                                                                                  | 2           |
| <b>Figure S2.</b> Powder ATR-FTIR spectra of the studied peptides in the range of 3600-800 $\text{cm}^{-1}$ .                                                                                                                                    | 4           |
| <b>Figure S3.</b> Raw ATR-FTIR spectra of the studied peptides in the range of 3600-800 $\text{cm}^{-1}$ directly after dissolving.                                                                                                              | 5           |
| <b>Figure S4.</b> Raw ATR-FTIR spectra of the studied peptides in the range of 3600-800 $\text{cm}^{-1}$ after 7 days of incubation at 37 °C.                                                                                                    | 6           |
| <b>Figure S5.</b> Raw ATR-FTIR spectra of the studied peptides in the range of 3600-800 $\text{cm}^{-1}$ after 30 days of incubation at 37 °C.                                                                                                   | 7           |
| <b>Figure S6.</b> Normalized ATR-FTIR spectra of air-dried films of the studied peptides with sub-bands obtained from the curve fitting procedure in the amide bands region, directly after dissolving (1750-1490 $\text{cm}^{-1}$ ).            | 8           |
| <b>Figure S7.</b> Normalized ATR-FTIR spectra of air-dried films of the studied peptides with sub-bands obtained from the curve fitting procedure in the amide bands region, after 7 days of incubation at 37 °C (1750-1490 $\text{cm}^{-1}$ ).  | 9           |
| <b>Figure S8.</b> Normalized ATR-FTIR spectra of air-dried films of the studied peptides with sub-bands obtained from the curve fitting procedure in the amide bands region, after 30 days of incubation at 37 °C (1750-1490 $\text{cm}^{-1}$ ). | 10          |
| <b>Figure S9.</b> Sedimentation coefficient distributions $c(s)$ obtained for different concentrations of the studied peptides resuspended in water.                                                                                             | 11          |
| <b>Figure S10.</b> TEM micrographs of the CAM group peptides registered 30 minutes after dissolving.                                                                                                                                             | 12          |
| <b>Figure S11.</b> TEM micrographs of the Di group peptides registered 30 minutes after dissolving.                                                                                                                                              | 13          |
| <b>Figure S12.</b> TEM micrographs of the CAM group peptides registered after 48 hours of incubation at 37 °C.                                                                                                                                   | 14          |
| <b>Figure S13.</b> TEM micrographs of the Di group peptides registered after 48 hours of incubation at 37 °C.                                                                                                                                    | 15          |
| <b>Figure S14.</b> Diameter size distribution of the studied peptides recorded by TEM 30 minutes after dissolving.                                                                                                                               | 16          |
| <b>Figure S15.</b> Diameter size distribution of the studied peptides recorded by TEM after 48 hours of incubation at 37 °C.                                                                                                                     | 17          |
| <b>Figure S16.</b> Normalized ThT fluorescence curves.                                                                                                                                                                                           | 18          |
| <b>Table S3.</b> Parameters obtained from modeling the aggregation kinetics of the peptides.                                                                                                                                                     | 18          |
| <b>Table S4.</b> Results of turbidity measurements.                                                                                                                                                                                              | 18          |

**Table S1.** Sequences and formulas of the synthesized peptides.

| Peptide | Sequence                                       | Formula                                                           |
|---------|------------------------------------------------|-------------------------------------------------------------------|
|         | <i>gabcdef</i>                                 |                                                                   |
| Di 1    | H-KIAALKQKIAALKKEIAWLEAENAALQ-NH <sub>2</sub>  | C <sub>141</sub> H <sub>240</sub> N <sub>38</sub> O <sub>39</sub> |
| Di 2    | H-KIAALKQKNAALKKEIAWLEAEIAALQ-NH <sub>2</sub>  | C <sub>141</sub> H <sub>240</sub> N <sub>38</sub> O <sub>39</sub> |
| Di 1X   | H-KIAALKXKIAALKXEIAWLEXENAALQ-NH <sub>2</sub>  | C <sub>146</sub> H <sub>243</sub> N <sub>35</sub> O <sub>37</sub> |
| Di 2X   | H-KIAALKXKNAALKXEIAWLEXEIAALQ-NH <sub>2</sub>  | C <sub>146</sub> H <sub>243</sub> N <sub>35</sub> O <sub>37</sub> |
| CAM 1   | H-KIAALKQKIASLKQEIDALEYENDALEQ-NH <sub>2</sub> | C <sub>140</sub> H <sub>235</sub> N <sub>37</sub> O <sub>46</sub> |
| CAM 2   | H-KIRALKAKNAHLKQEIAALEQEIAALQ-NH <sub>2</sub>  | C <sub>138</sub> H <sub>240</sub> N <sub>42</sub> O <sub>40</sub> |
| CAM 1X  | H-KIAALKXKIASLKQEIDALEXENDALEQ-NH <sub>2</sub> | C <sub>140</sub> H <sub>238</sub> N <sub>34</sub> O <sub>42</sub> |
| CAM 2X  | H-KIRALKXKNAHLKXEIAALEXEIAALQ-NH <sub>2</sub>  | C <sub>144</sub> H <sub>247</sub> N <sub>39</sub> O <sub>37</sub> |

**Table S2.** Analytical data for the synthesized peptides.

| Peptide | Calculated M/z                                                      | Experimental M/z                                                    | Analytical HPLC t <sub>r</sub> [min] |
|---------|---------------------------------------------------------------------|---------------------------------------------------------------------|--------------------------------------|
| Di 1    | [(M+3H)/3] 1031.2743<br>[(M+4H)/4] 773.7077                         | [(M+3H)/3] 1031.2838<br>[(M+4H)/4] 773.7064                         | 16.200 <sup>1</sup>                  |
| Di 2    | [(M+3H)/3] 1031.2743<br>[(M+4H)/4] 773.7077                         | [(M+3H)/3] 1031.2859<br>[(M+4H)/4] 773.7079                         | 16.733 <sup>1</sup>                  |
| Di 1X   | [(M+2H)/2] 1540.9198<br>[(M+3H)/3] 1027.6158<br>[(M+4H)/4] 770.9638 | [(M+2H)/2] 1540.9132<br>[(M+3H)/3] 1027.6144<br>[(M+4H)/4] 770.9599 | 18.233 <sup>1</sup>                  |
| Di 2X   | [(M+2H)/2] 1540.9198<br>[(M+3H)/3] 1027.6158<br>[(M+4H)/4] 770.9638 | [(M+2H)/2] 1540.9789<br>[(M+3H)/3] 1027.6158<br>[(M+4H)/4] 770.9665 | 11.319 <sup>2</sup>                  |
| CAM 1   | [(M+3H)/3] 1058.2484<br>[(M+4H)/4] 793.9382                         | [(M+3H)/3] 1058.2490<br>[(M+4H)/4] 793.9403                         | 9.453 <sup>2</sup>                   |
| CAM 2   | [(M+3H)/3] 1043.2767<br>[(M+4H)/4] 782.9601                         | [(M+3H)/3] 1043.2759<br>[(M+4H)/4] 782.9429                         | 9.448 <sup>2</sup>                   |
| CAM 1X  | [(M+4H)/4] 768.1969<br>[(M+5H)/5] 614.7591                          | [(M+4H)/4] 768.0991<br>[(M+5H)/5] 614.6814                          | 9.680 <sup>2</sup>                   |
| CAM 2X  | [(M+4H)/4] 779.9747<br>[(M+5H)/5] 624.1813                          | [(M+4H)/4] 779.8937<br>[(M+5H)/5] 624.0977                          | 10.311 <sup>2</sup>                  |

<sup>1</sup>Analytical HPLC was performed using Waters C18 1.7 μm 50 × 2.1 mm column. Program (eluent A: 0.05% TFA in H<sub>2</sub>O, eluent B: 0.05% TFA in acetonitrile, flow 0.5 mL/min): A: t = 0 min, 90% A; t = 30 min, 10% A.

<sup>2</sup>Analytical HPLC was performed using Kinetex 5 μm EVO C18 100 Å 150 × 4.6 mm column. Program (eluent A: 0.05% TFA in H<sub>2</sub>O, eluent B: 0.05% TFA in acetonitrile, flow 0.5 mL/min): A: t = 0 min, 90% A; t = 25 min, 10% A.



B)

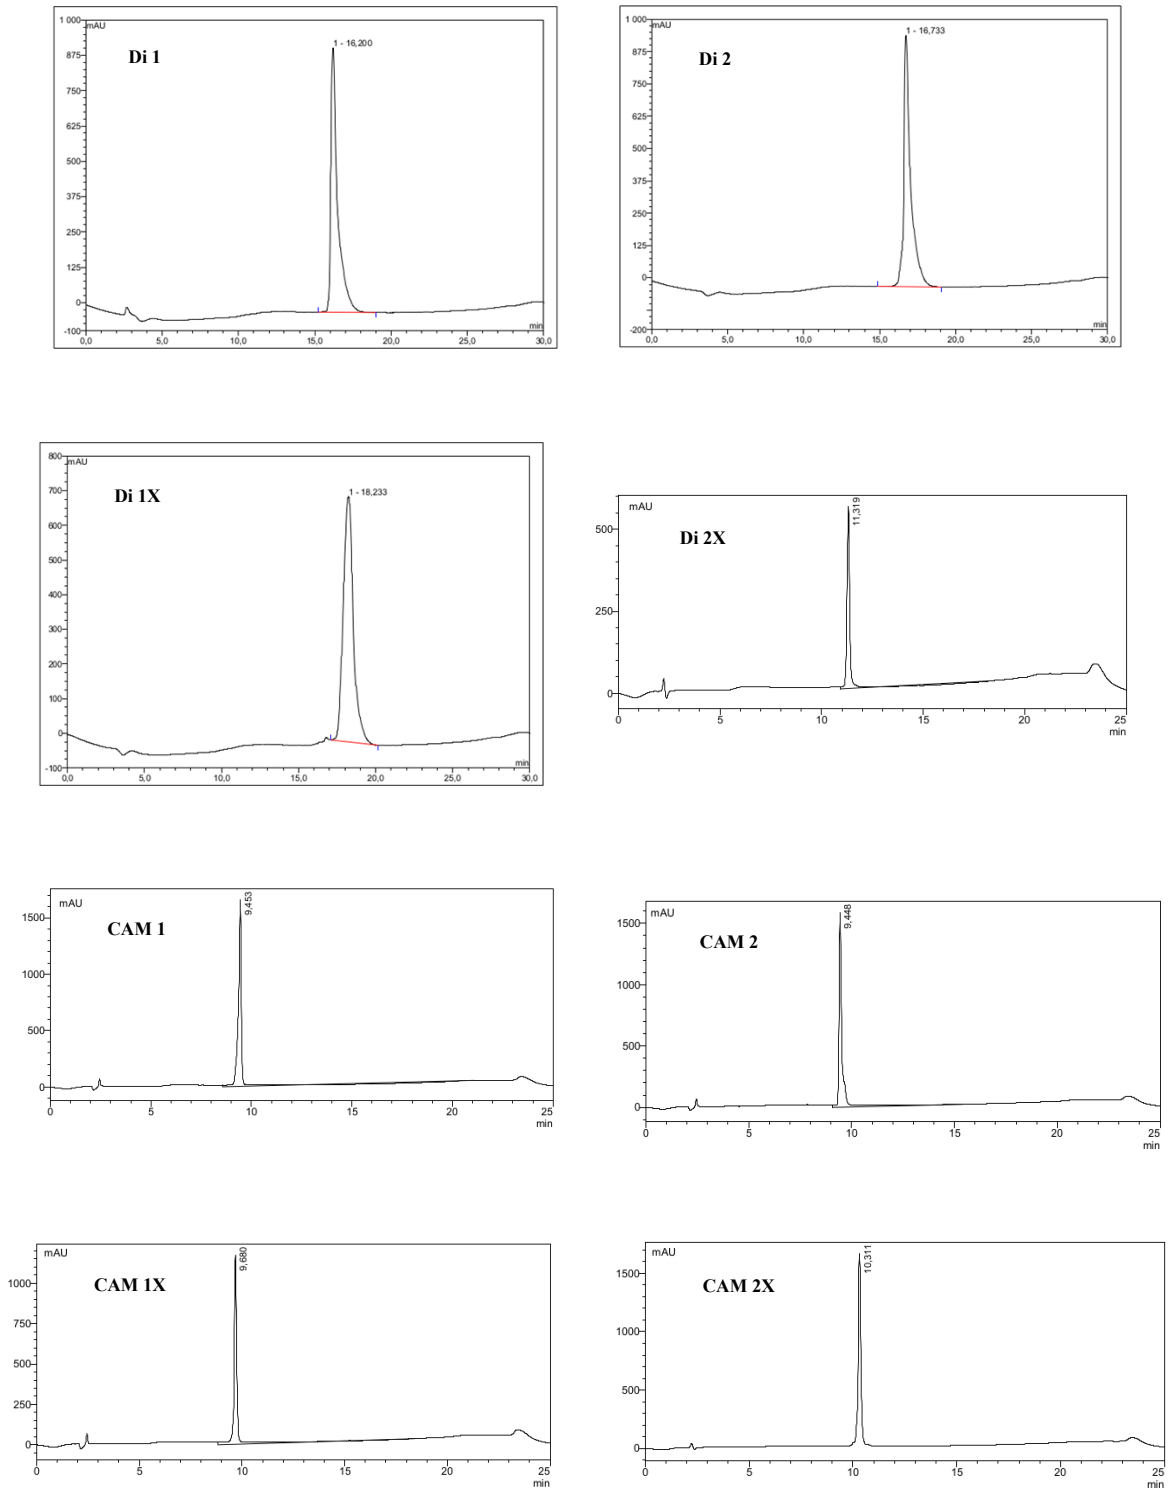

**Figure S1.** A) Mass spectra and B) analytical HPLC chromatograms of the studied peptides.

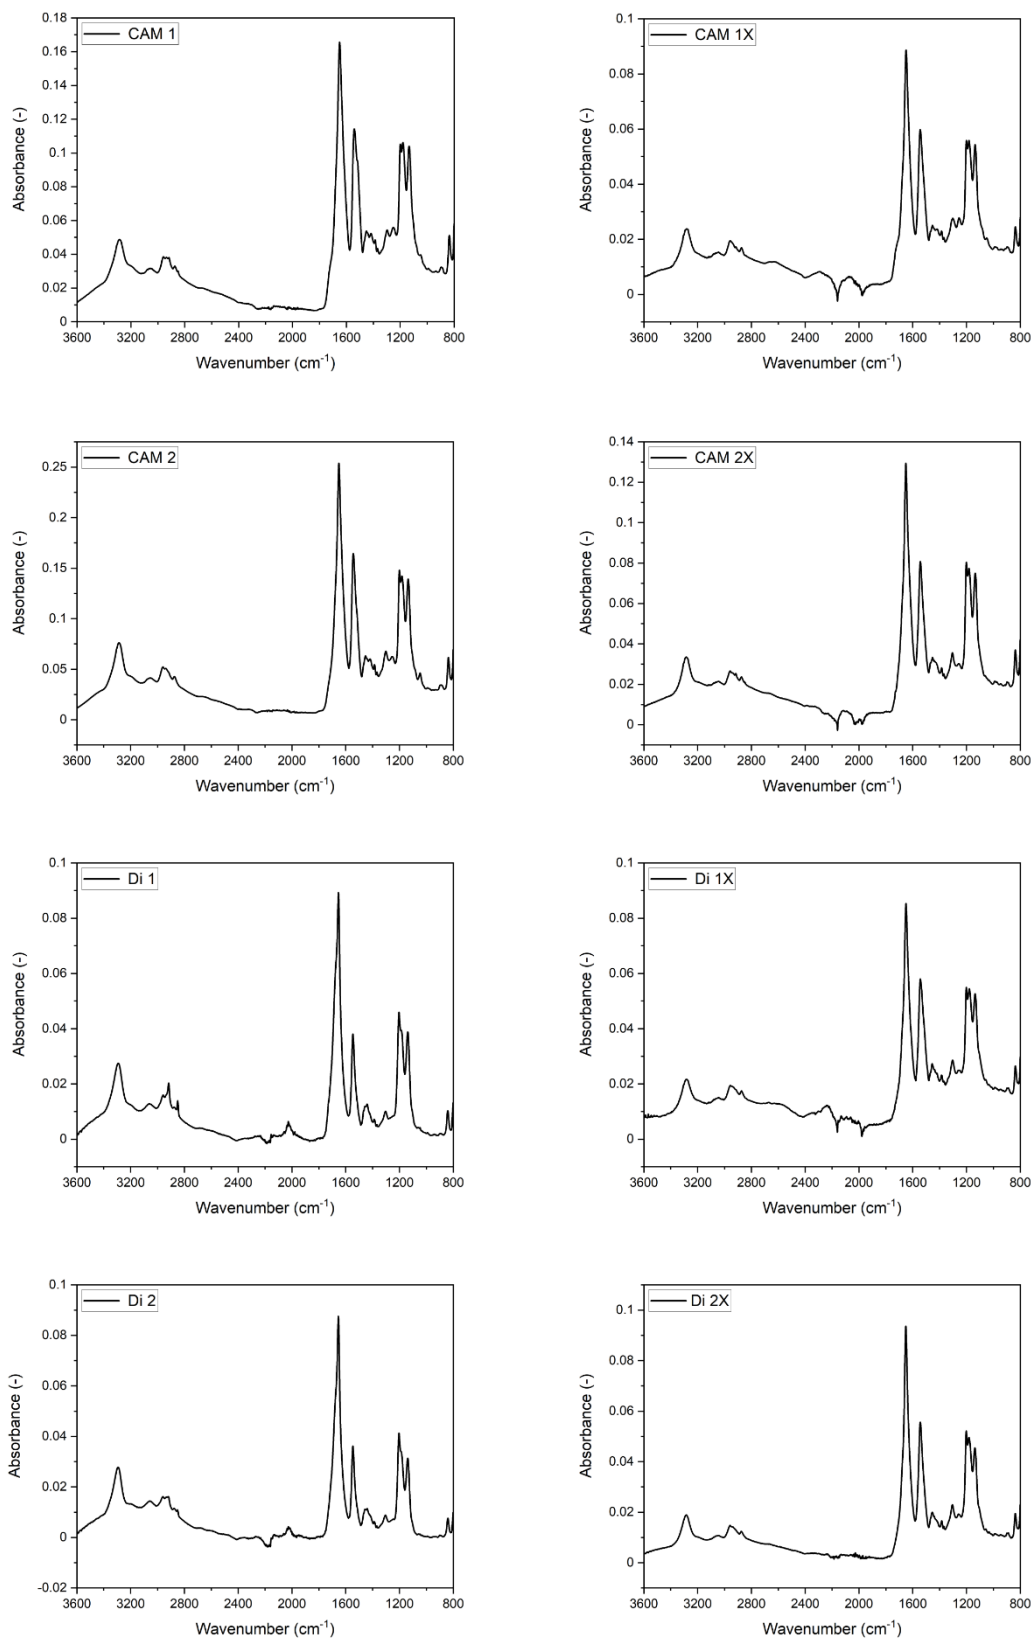

**Figure S2.** Powder ATR-FTIR spectra of the studied peptides in the range of 3600–800 cm<sup>-1</sup>.

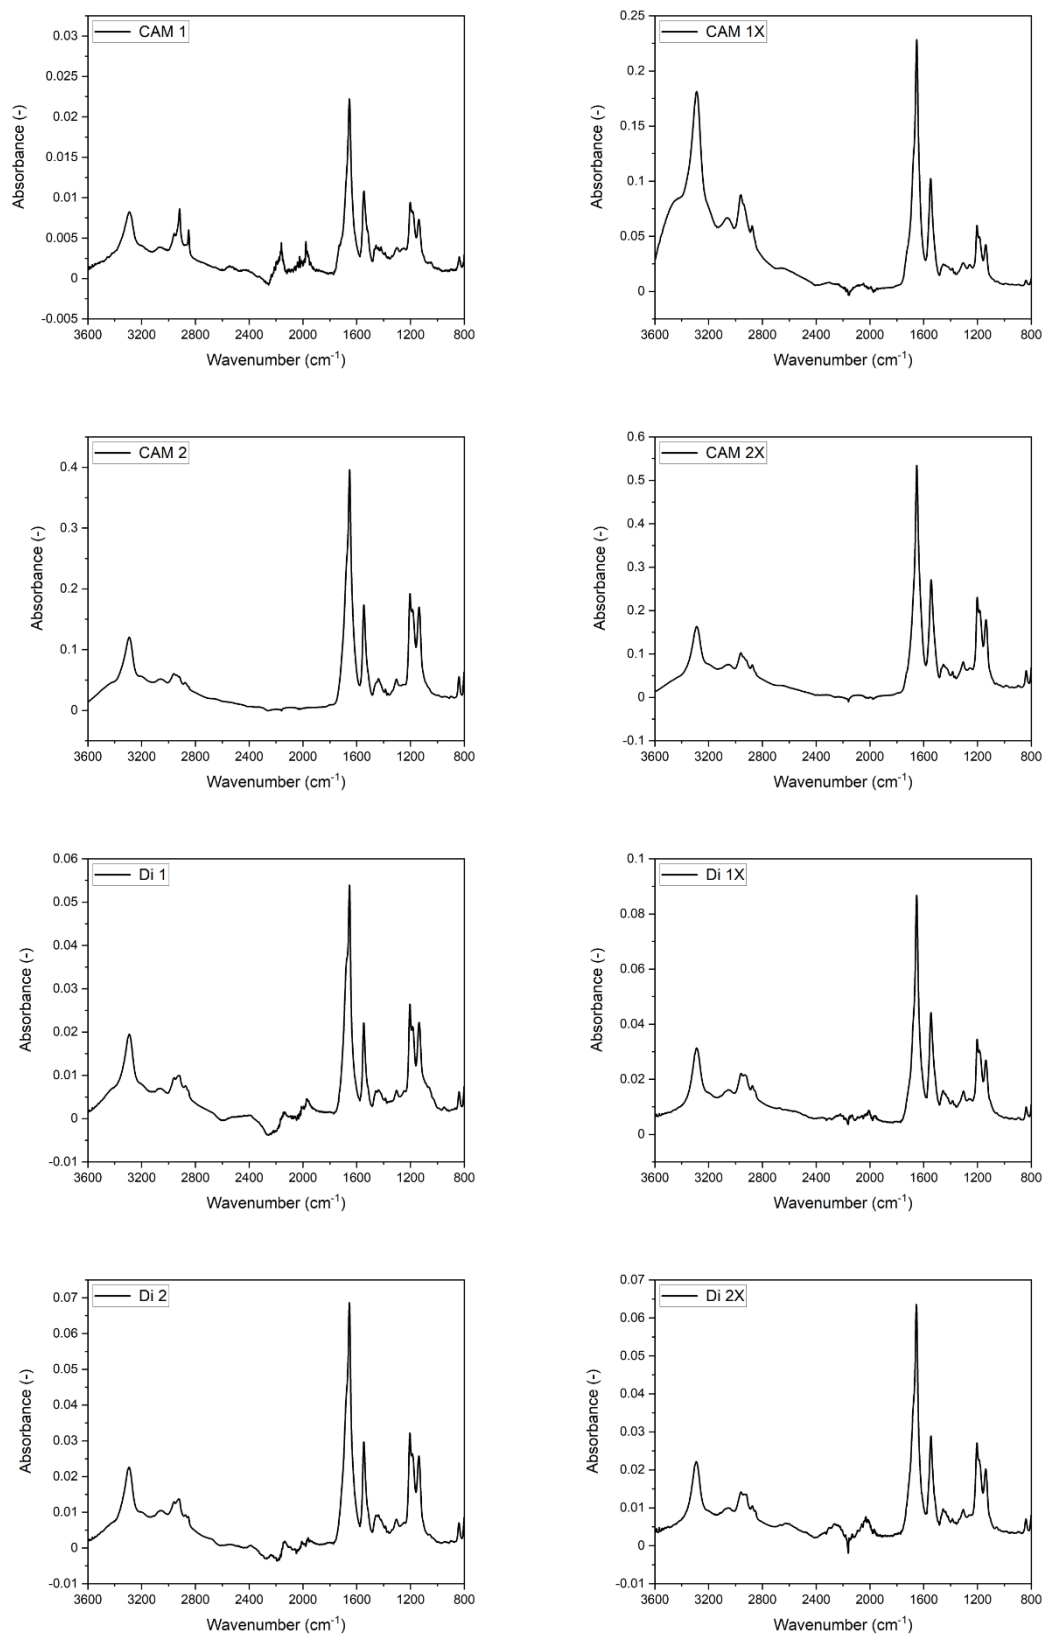

**Figure S3.** Raw ATR-FTIR spectra of the studied peptides in the range of 3600–800  $\text{cm}^{-1}$  directly after dissolving.  $C_{\text{pep}}=1 \text{ mg/mL}$  [0.317–0.327] mM.

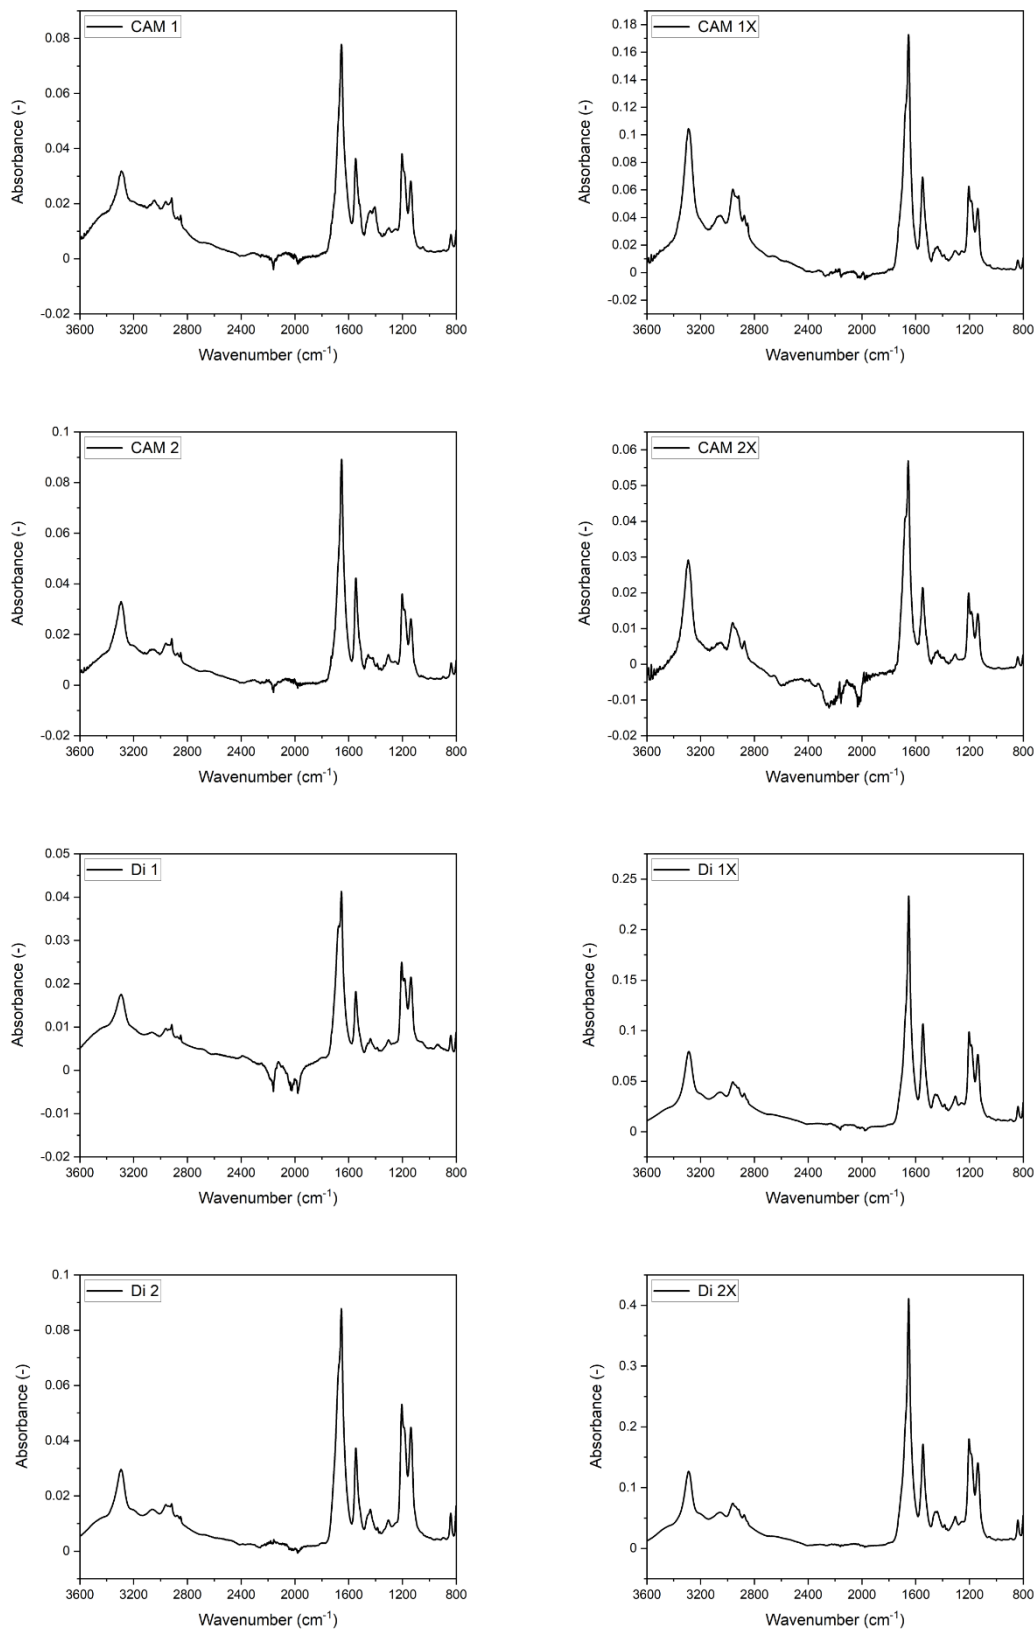

**Figure S4.** Raw ATR-FTIR spectra of the studied peptides in the range of 3600–800 cm<sup>-1</sup> after 7 days of incubation at 37 °C.  $C_{\text{pep}}=1$  mg/mL [0.317–0.327] mM.

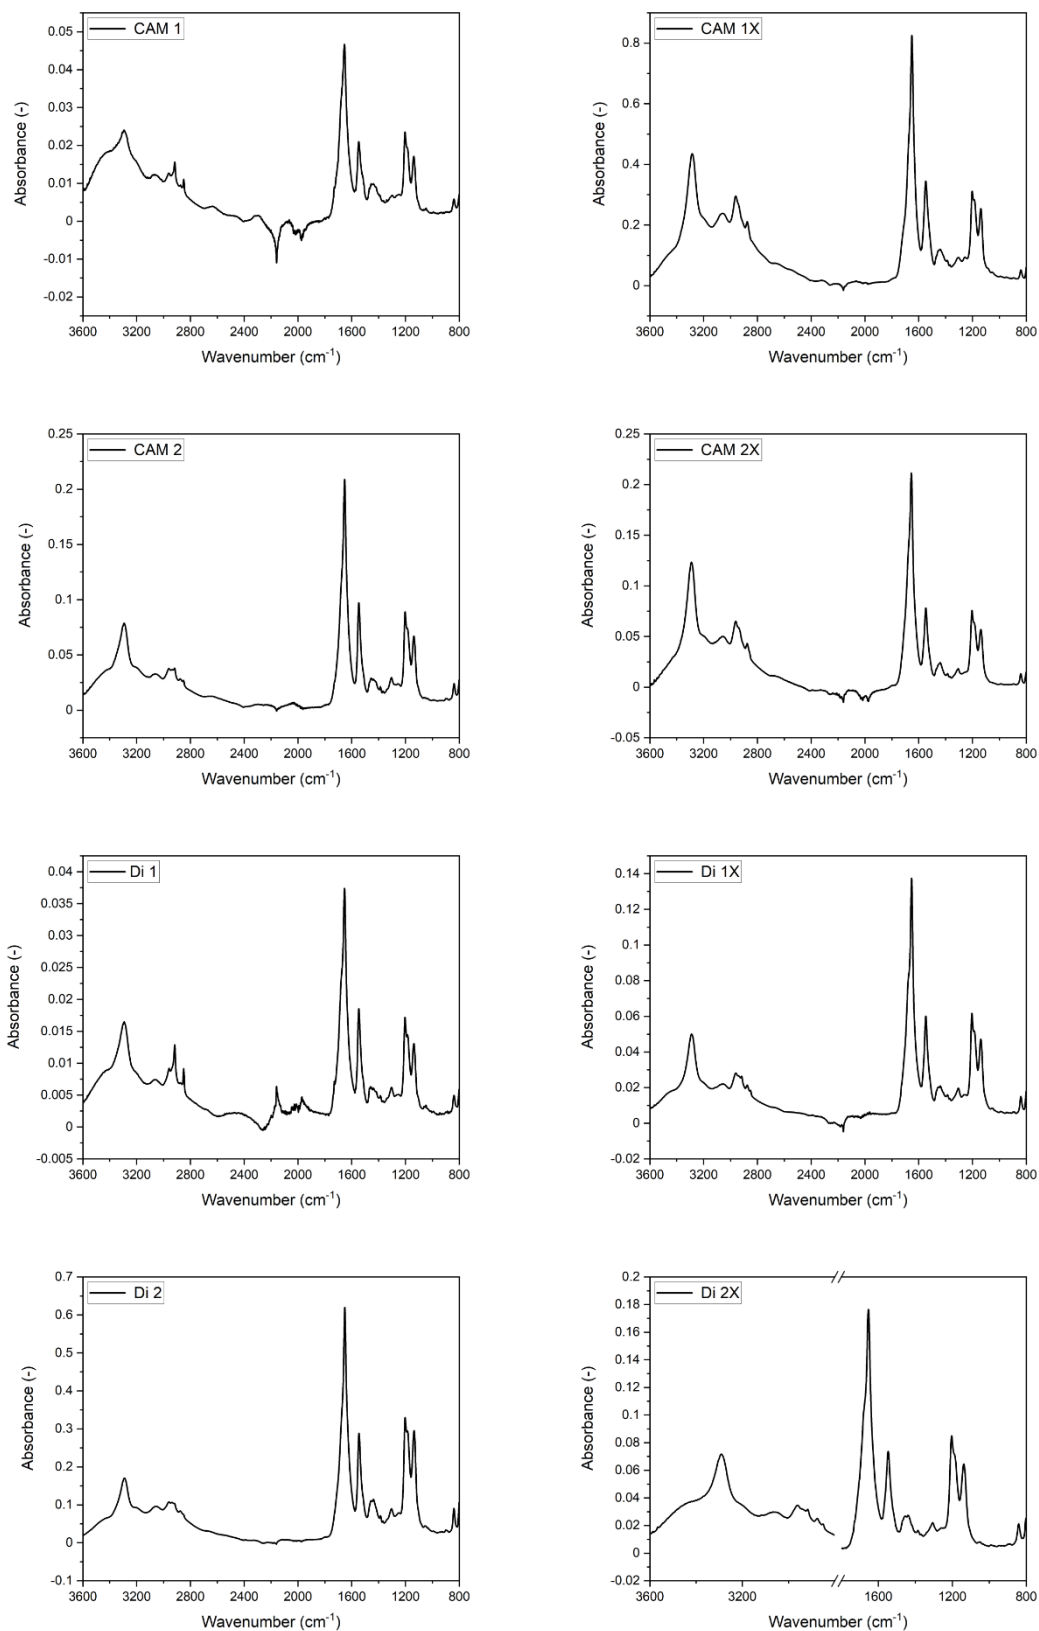

**Figure S5.** Raw ATR-FTIR spectra of the studied peptides in the range of 3600–800  $\text{cm}^{-1}$  after 30 days of incubation at 37 °C.  $C_{\text{pep}}=1 \text{ mg/mL}$  [0.317–0.327] mM.



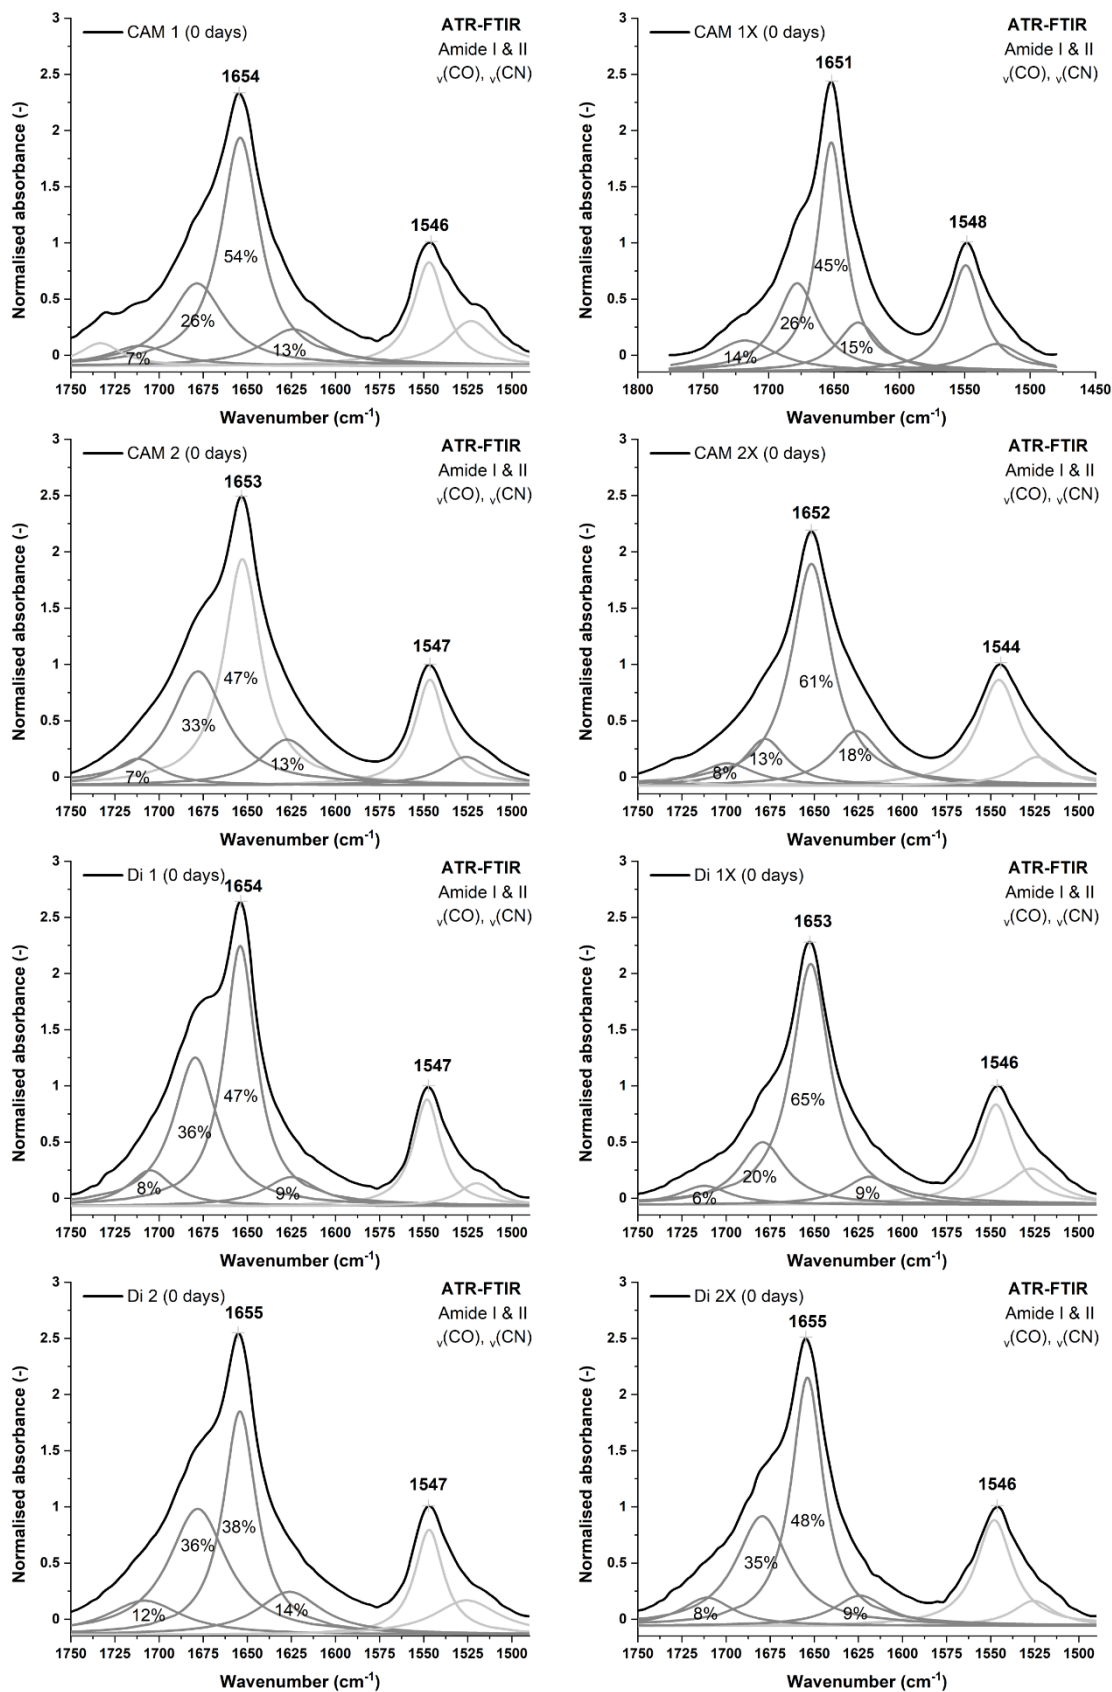

**Figure S6.** Normalized ATR-FTIR spectra of air-dried films of the studied peptides with subbands obtained from the curve fitting procedure in the amide bands region, directly after dissolving (1750–1490 cm<sup>-1</sup>).  $C_{\text{pep}}=1$  mg/mL [0.317–0.327] mM.

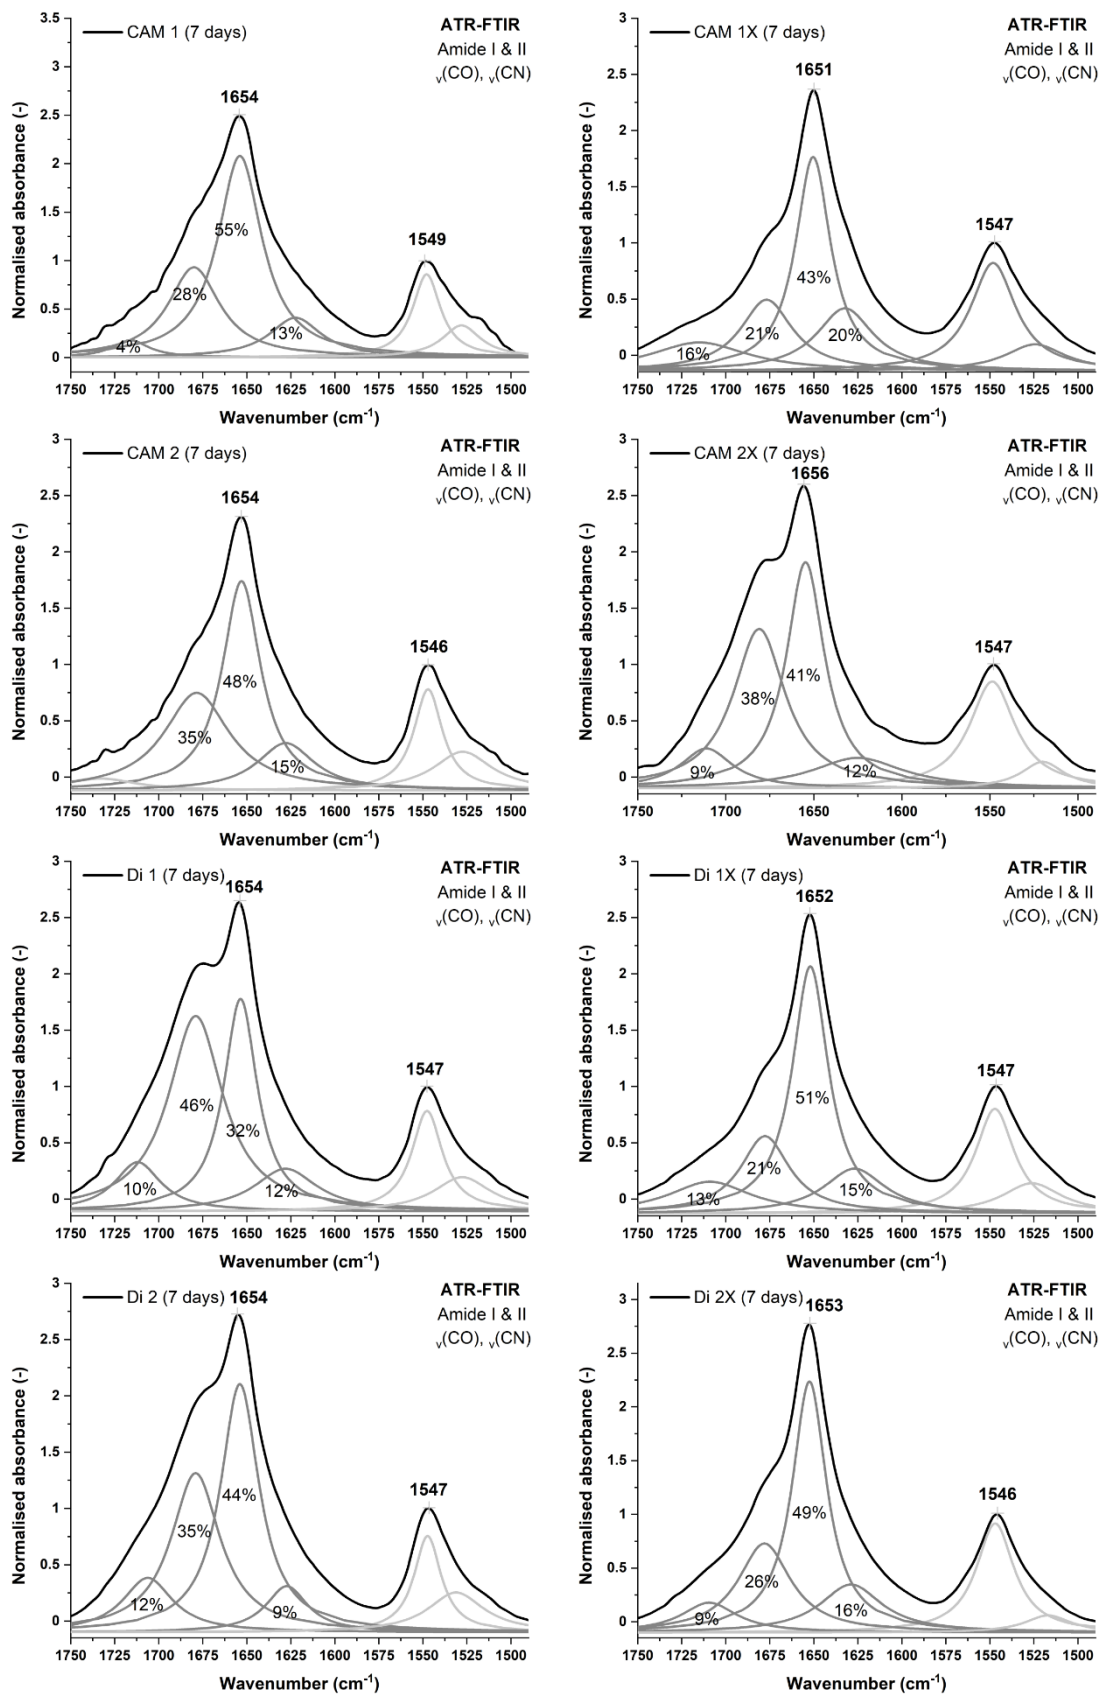

**Figure S7.** Normalized ATR-FTIR spectra of air-dried films of the studied peptides with subbands obtained from the curve fitting procedure in the amide bands region, after 7 days of incubation at 37 °C (1750–1490  $\text{cm}^{-1}$ ).  $C_{\text{pep}}=1 \text{ mg/mL}$  [0.317–0.327] mM.

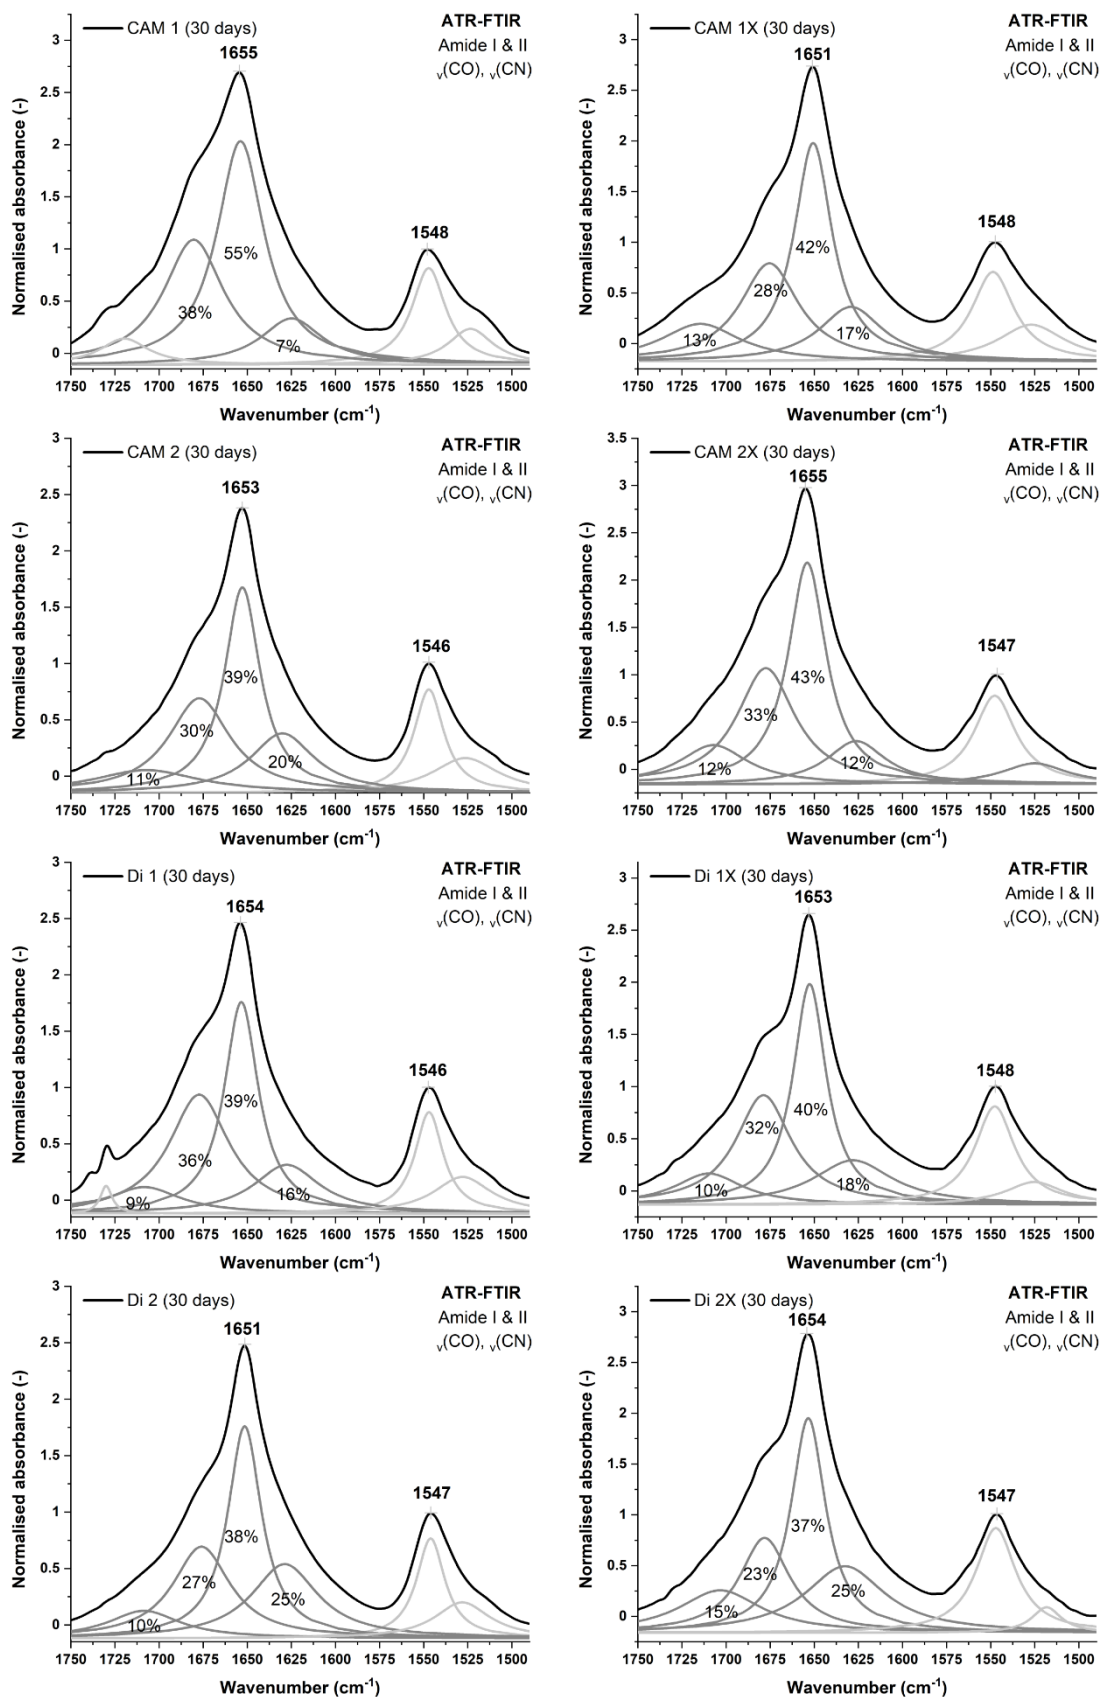

**Figure S8.** Normalized ATR-FTIR spectra of air-dried films of the studied peptides with subbands obtained from the curve fitting procedure in the amide bands region, after 30 days of incubation at 37 °C (1750–1490 cm<sup>-1</sup>).  $C_{\text{pep}}=1$  mg/mL [0.317–0.327] mM.

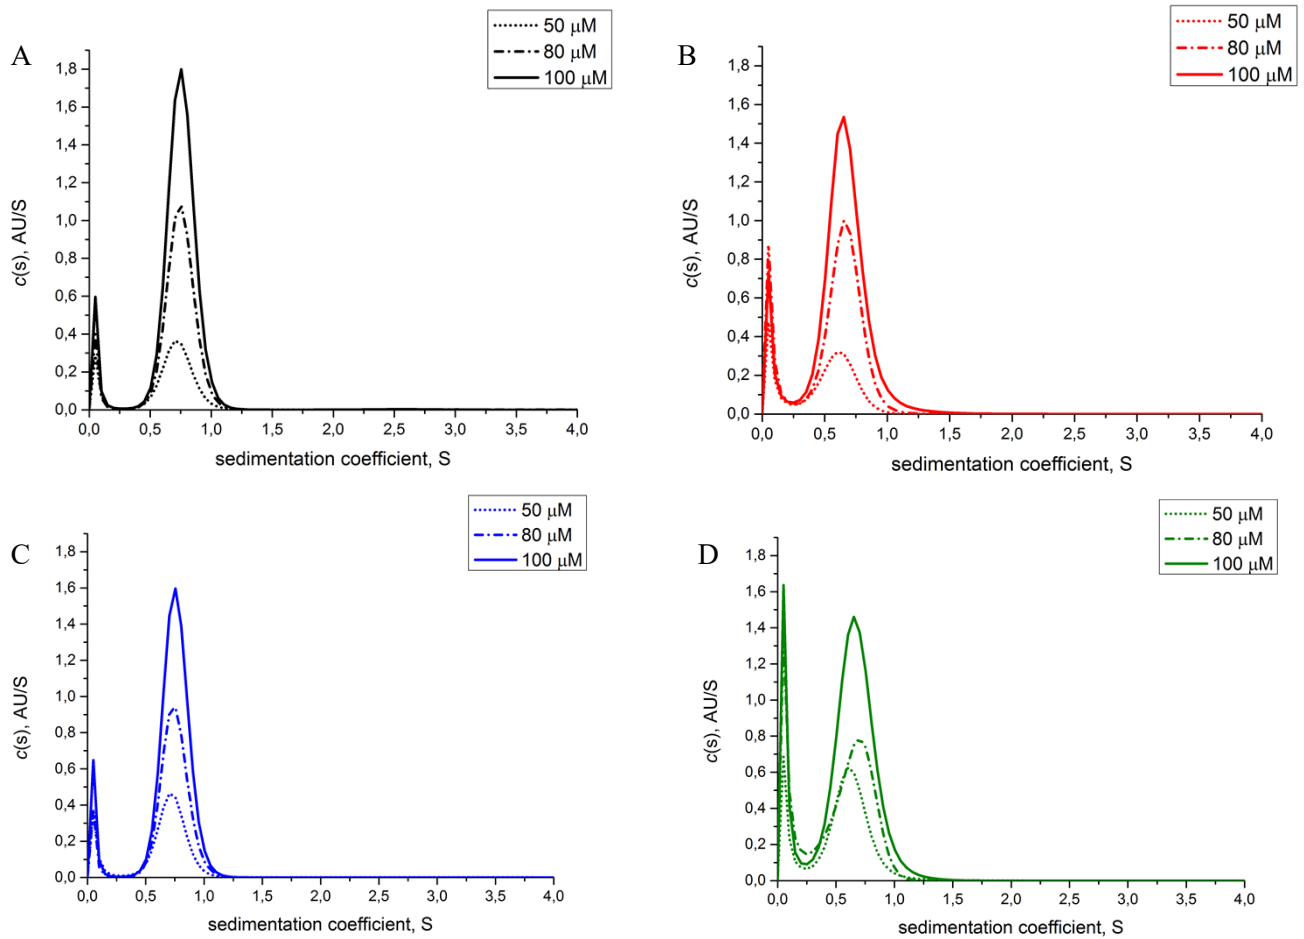

**Figure S9.** Sedimentation coefficient distributions  $c(s)$  obtained for different concentrations of the studied peptides resuspended in water. Centrifugation was performed at 50 000 rpm and 20 °C.

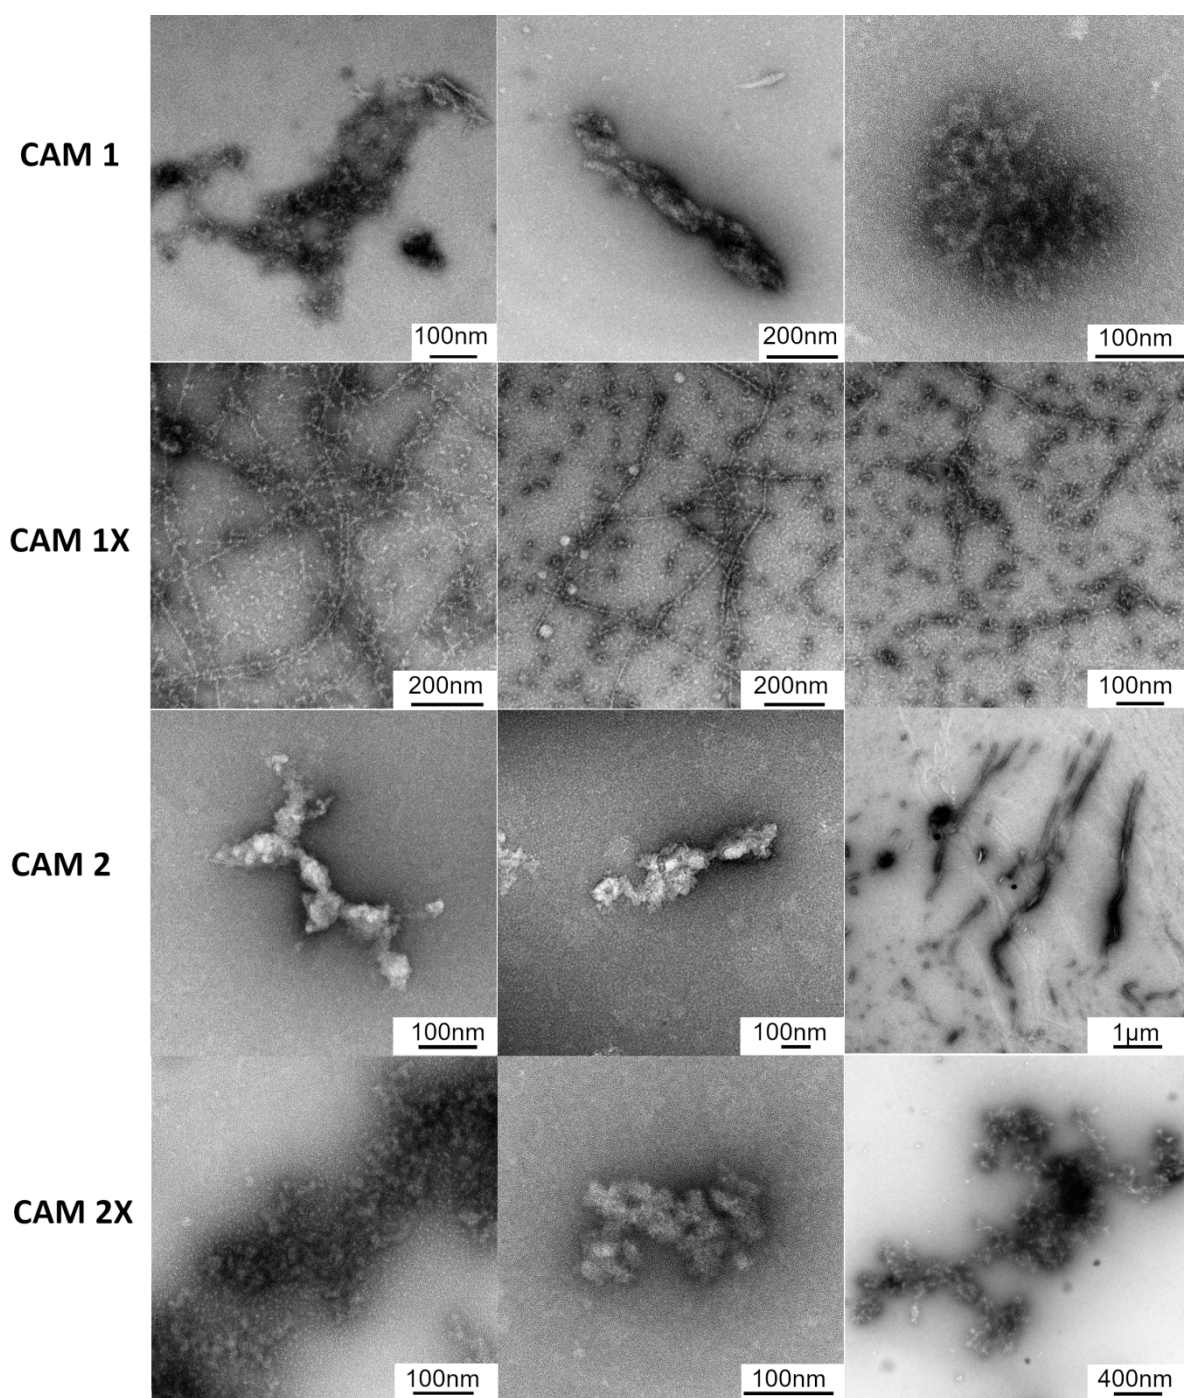

**Figure S10.** TEM micrographs of the CAM group peptides recorded 30 minutes after dissolving.  $C_{\text{pep}} = 0.5 \text{ mg/mL}$  [0.159–0.164] mM.

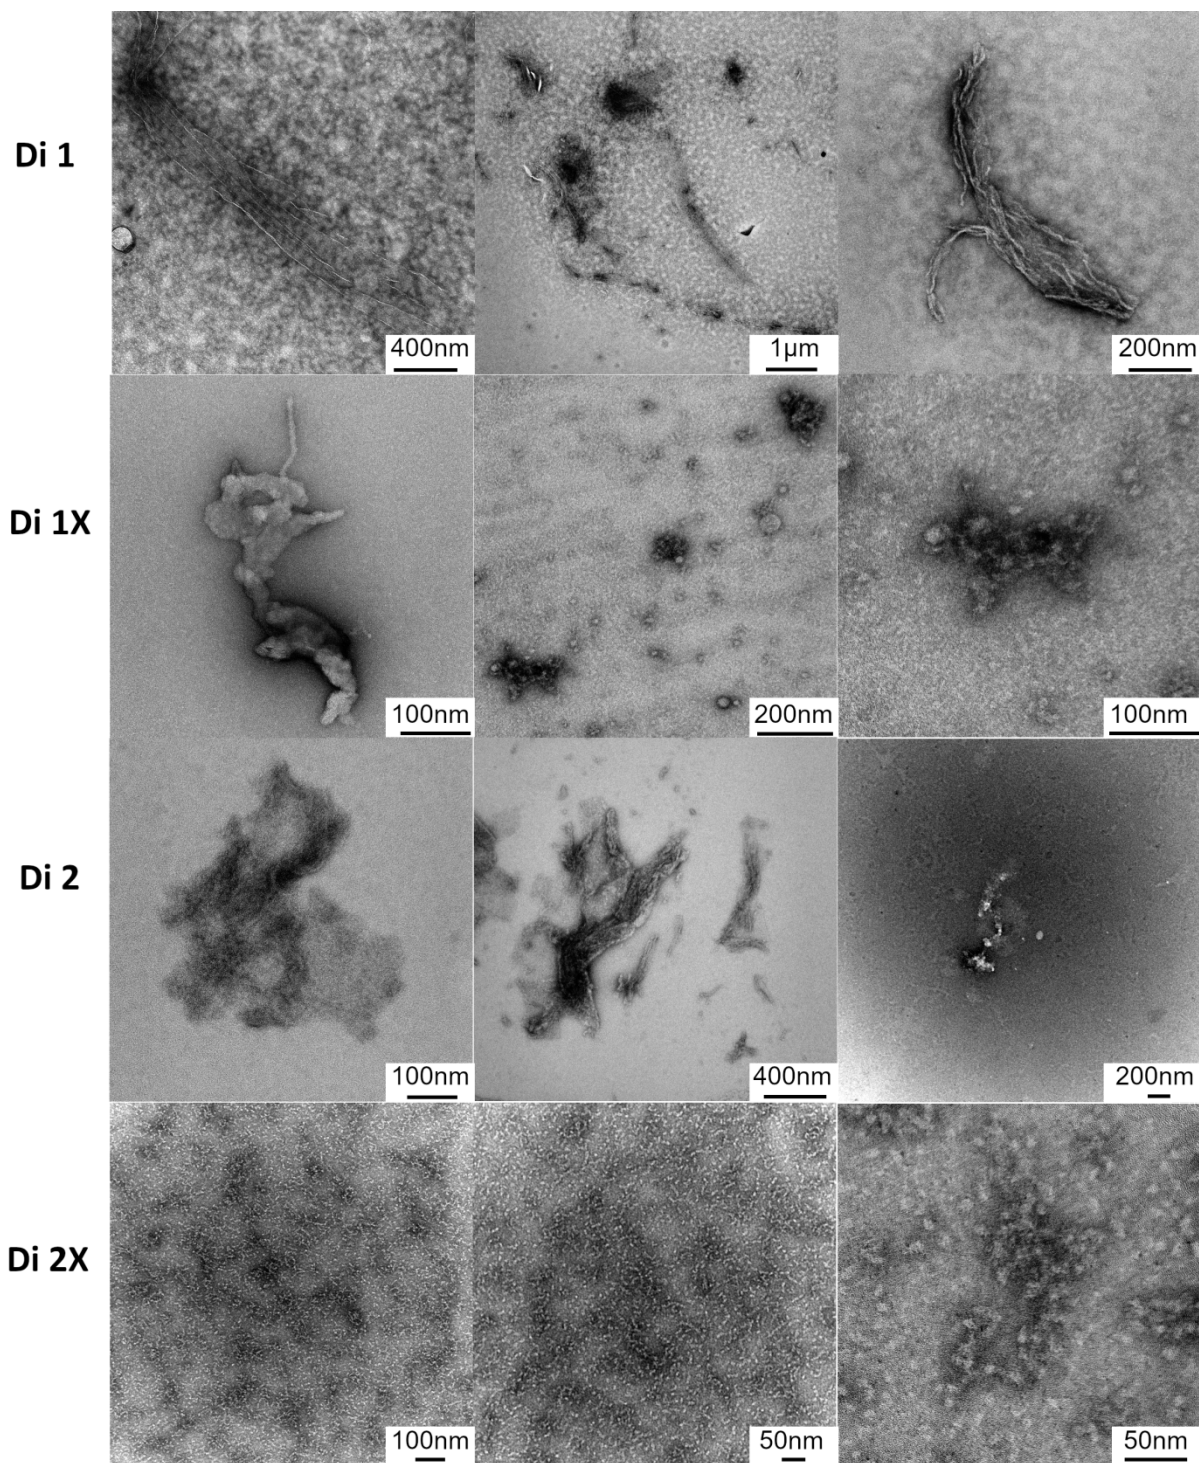

**Figure S11.** TEM micrographs of the Di group peptides recorded 30 minutes after dissolving.  $C_{\text{pep}}=0.5 \text{ mg/mL}$  [0.159–0.164] mM.

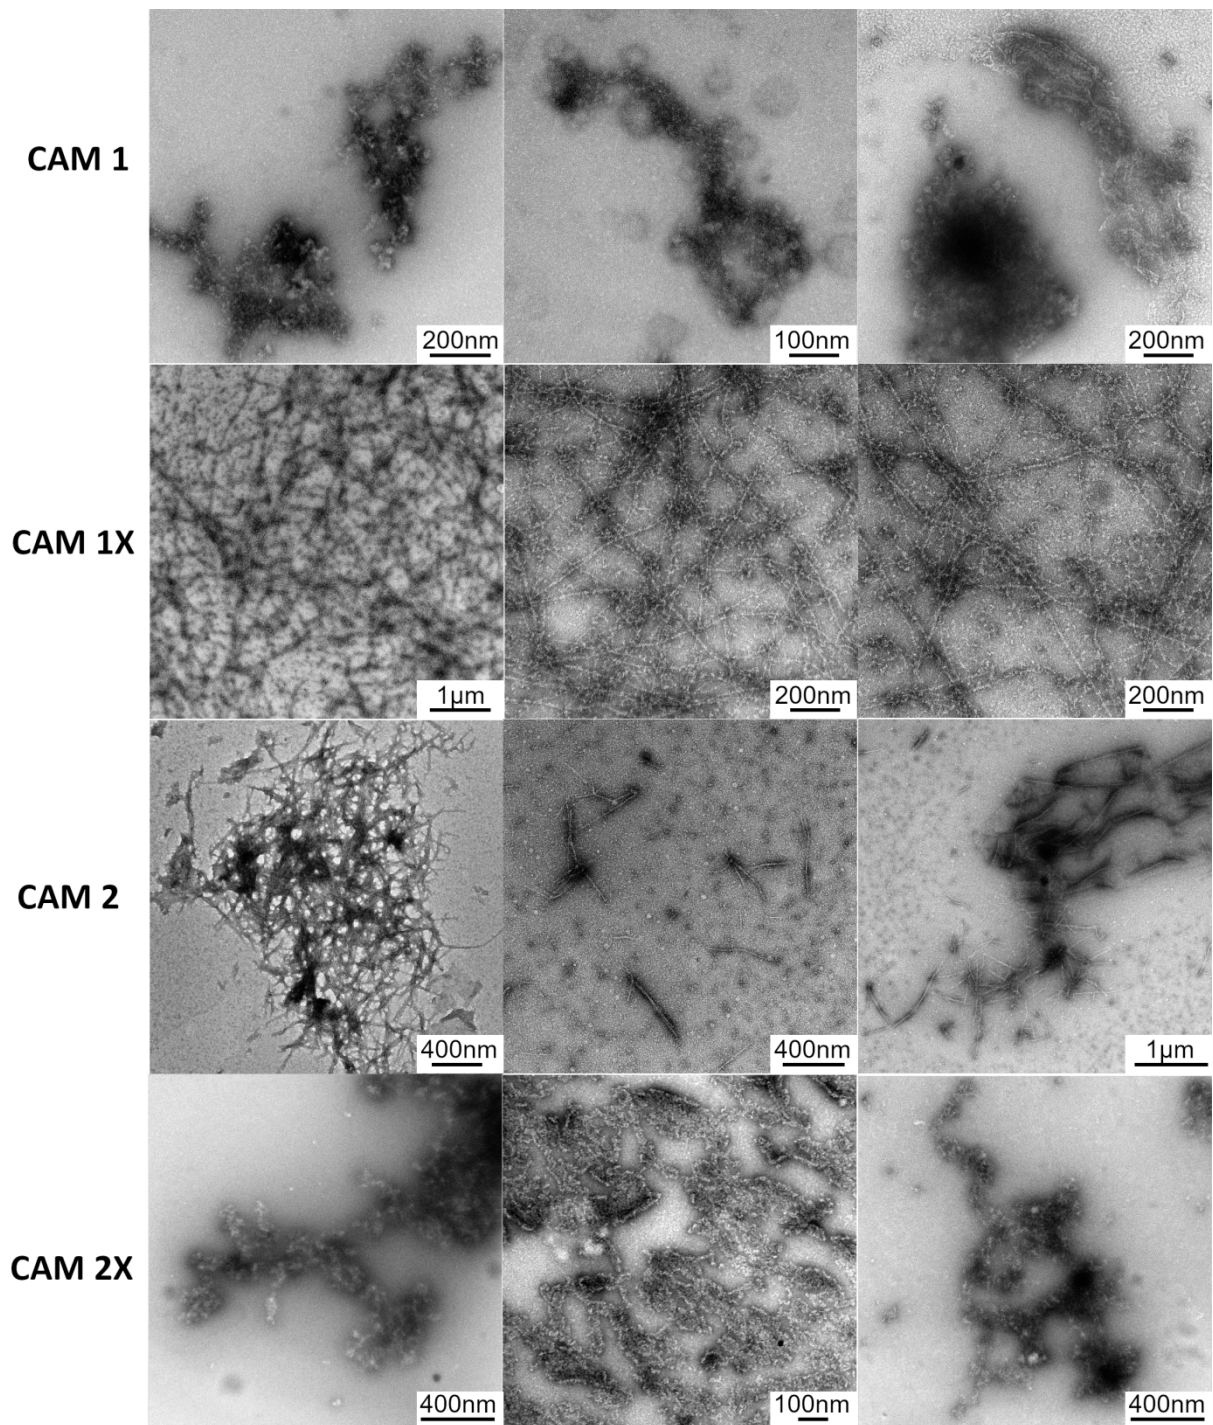

**Figure S12.** TEM micrographs of the CAM group peptides recorded after 48 hours of incubation at 37 °C.  $C_{\text{pep}} = 0.5 \text{ mg/mL}$  [0.159–0.164] mM.

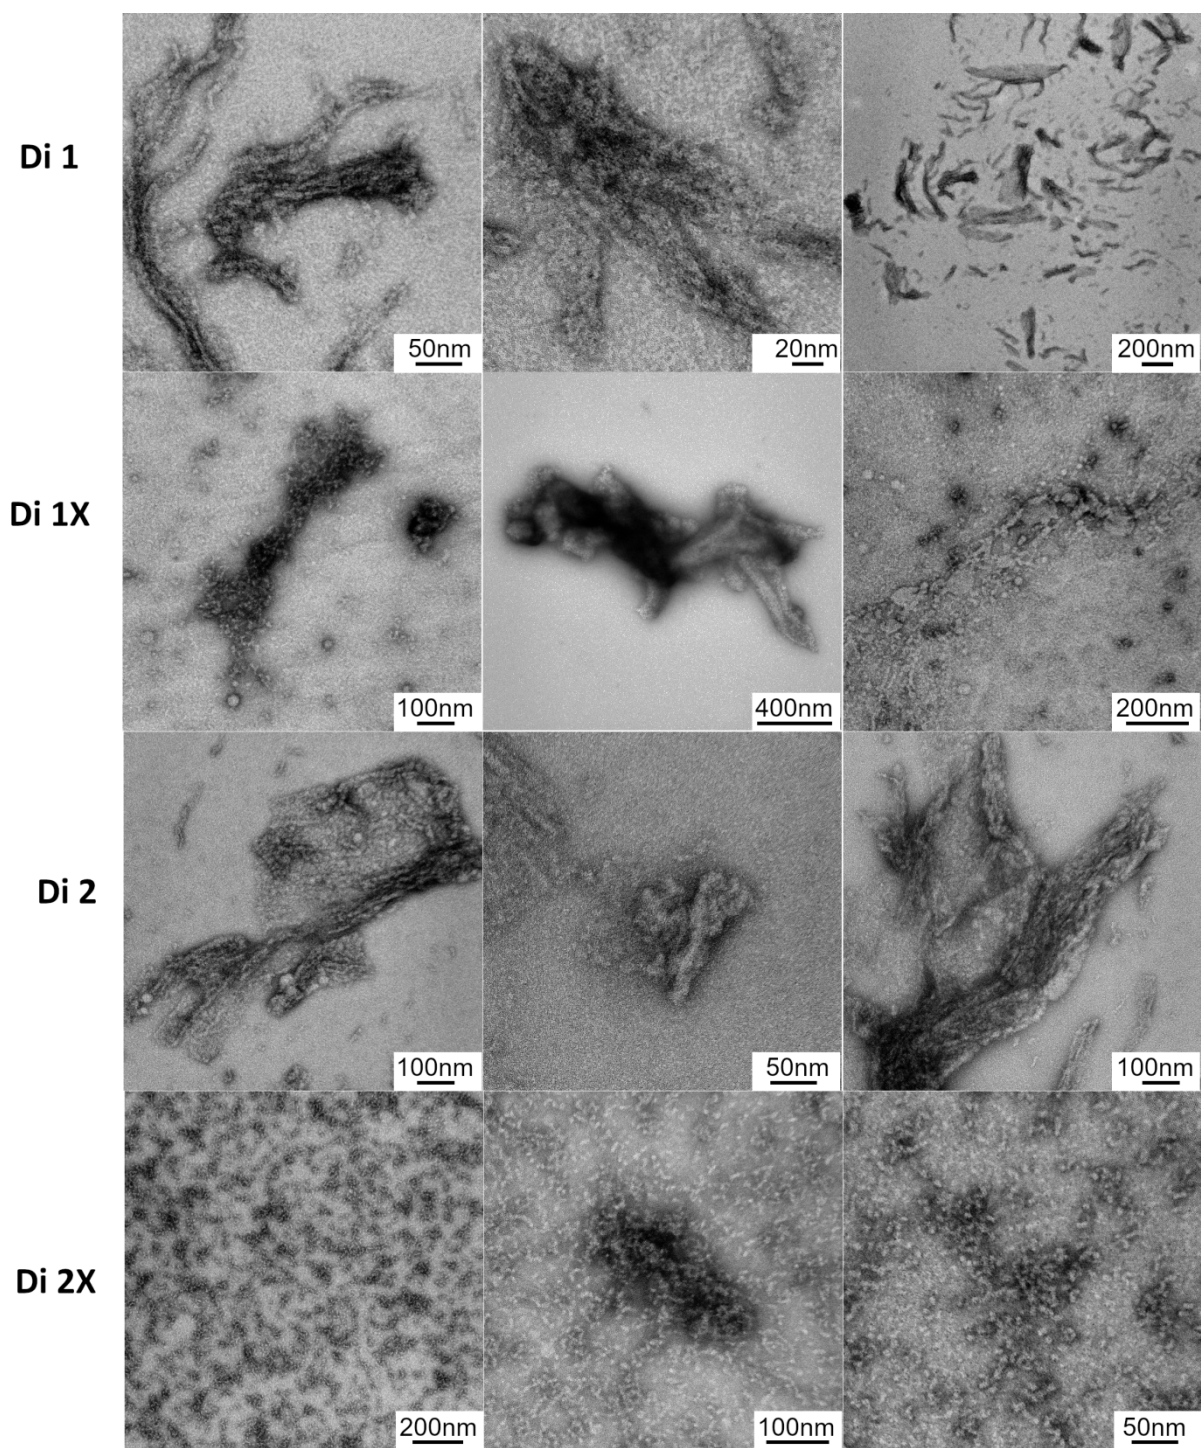

**Figure S13.** TEM micrographs of the Di group peptides recorded after 48 hours of incubation at 37 °C.  $C_{\text{pep}} = 0.5 \text{ mg/mL}$  [0.159–0.164] mM.



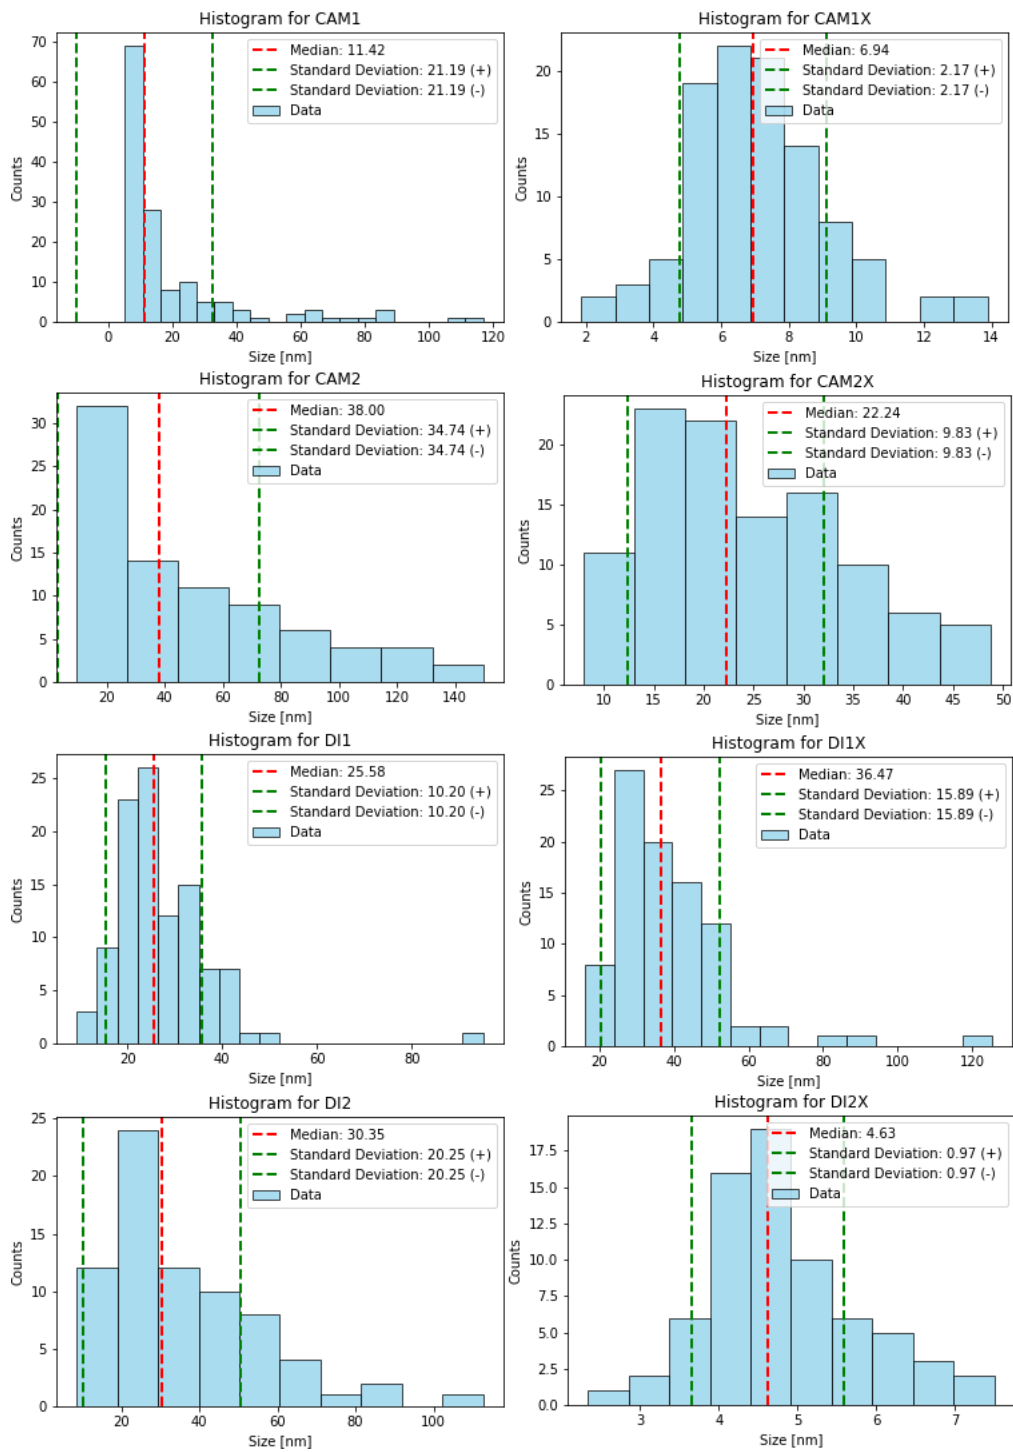

**Figure S14.** Diameter size distribution of the studied peptides recorded by TEM 30 minutes after dissolving.  $C_{\text{pep}} = 0.5 \text{ mg/mL}$  [0.159–0.164] mM.

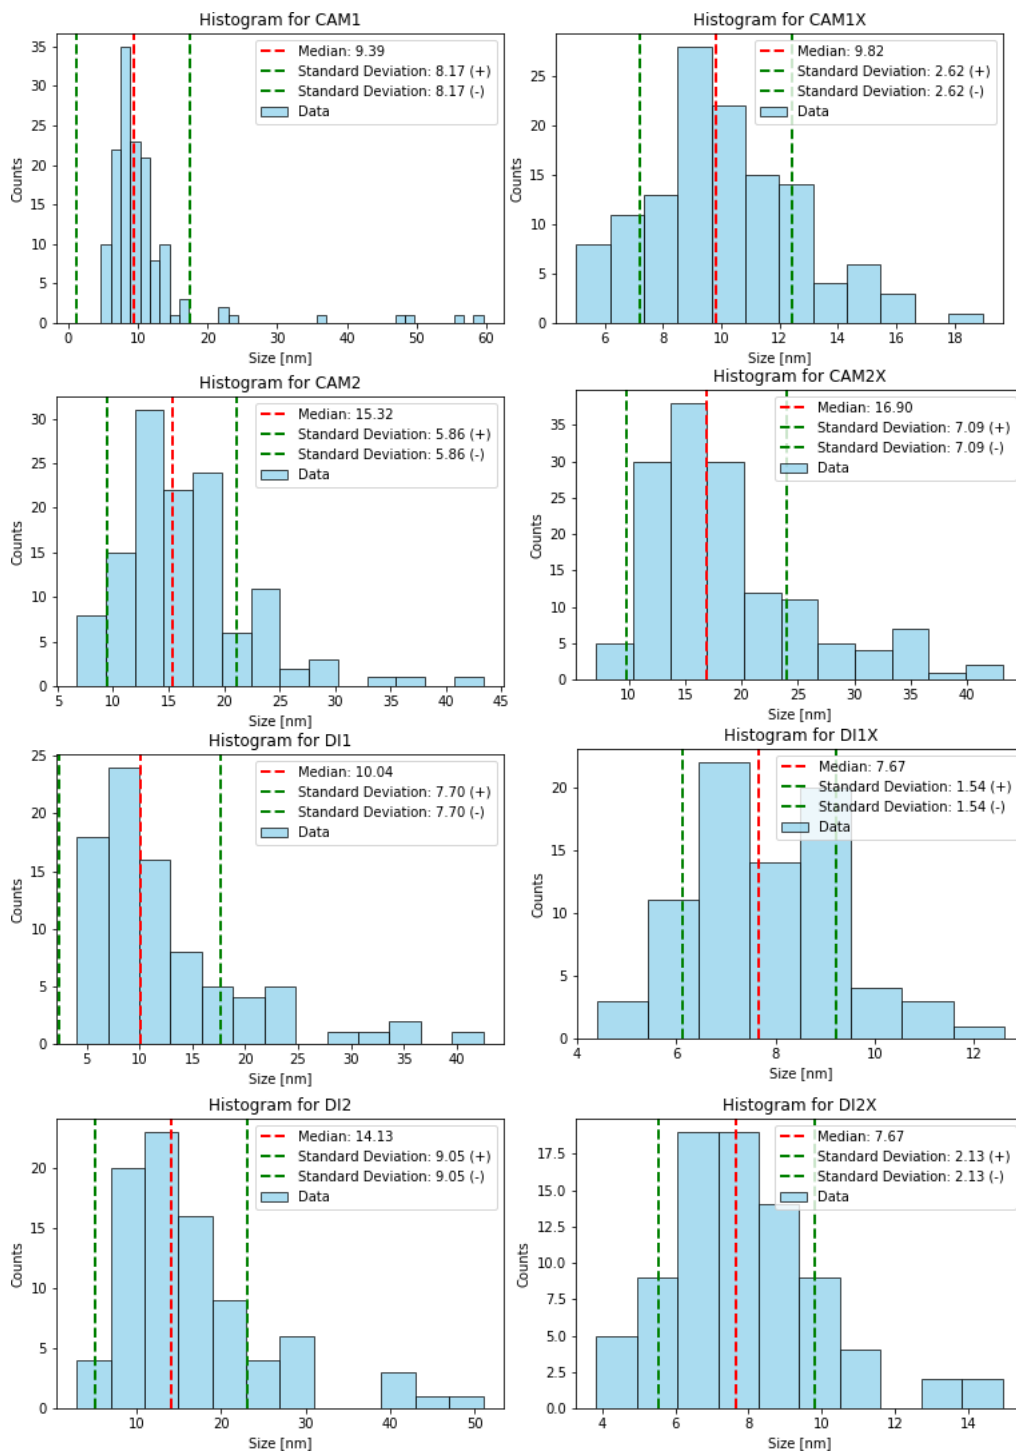

**Figure S15.** Diameter size distribution of the studied peptides recorded by TEM after 48 hours of incubation at 37 °C.  $C_{\text{pep}} = 0.5 \text{ mg/mL}$  [0.159–0.164] mM.

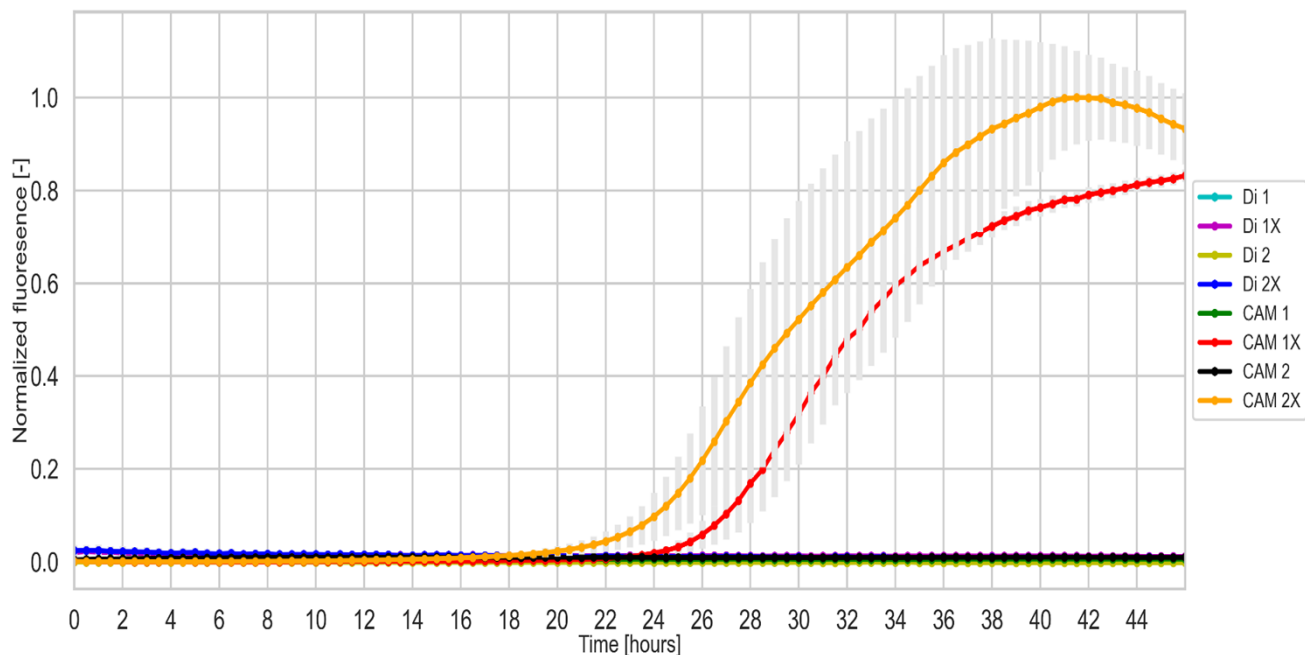

**Figure S16.** Normalized ThT fluorescence curves showing the aggregation kinetics of studied peptides.  $C_{\text{pep}} = 100 \mu\text{M}$ .

**Table S3.** Parameters obtained from modeling the aggregation kinetics of the peptides at a concentration of  $C_{\text{pep}} = 100 \mu\text{M}$ . In this model,  $y_i$  and  $y_f$  correspond to the initial and final intercepts on the y-axis, while  $m_i$  and  $m_f$  represent the slopes of these baselines. The elongation phase midpoint is given by  $t_{\text{half}}$ . The aggregation onset, or lag time, is determined as  $t_{\text{lag}} = t_{\text{half}} - 2\tau$ , where  $\tau$  represents the time constant for elongation, following the method described by Malmos et al. 2017.

| Sample        | $y_i$ [-] | $y_f$ [-] | $m_i$ [-] | $t_{\text{half}}$ [hours] | $\tau$ [-] | $t_{\text{lag}}$ [hours] |
|---------------|-----------|-----------|-----------|---------------------------|------------|--------------------------|
| <b>Di 1</b>   | 0.00E+00  | 0.00      | 0.00      | 0.00                      | 3.00       | 0.00                     |
| <b>Di 1X</b>  | 0.00E+00  | 0.00      | 0.00      | 0.00                      | 2.50       | 0.00                     |
| <b>Di 2</b>   | 0.00E+00  | 0.00      | 0.00      | 0.00                      | 2.99       | 0.00                     |
| <b>Di 2X</b>  | 0.00E+00  | 0.00      | 0.00      | 0.00                      | 2.50       | 0.00                     |
| <b>CAM 1</b>  | 7.54E-04  | 0.00      | 0.00      | 1.20                      | 2.50       | 0.00                     |
| <b>CAM 1X</b> | 8.07E-23  | 0.75      | 0.02      | 28.80                     | 3.00       | 22.80                    |
| <b>CAM 2</b>  | 5.61E-14  | 0.01      | 0.08      | 4.80                      | 3.00       | 0.00                     |
| <b>CAM 2X</b> | 2.48E-15  | 0.60      | 0.08      | 33.00                     | 3.00       | 27.00                    |

**Table S4.** Results of turbidity measurements based on absorbance at 340 nm.

| Time [hours] | Di 1  | Di 1X | Di 2  | Di 2X | CAM1  | CAM 1X | CAM2  | CAM 2X | PBS   |
|--------------|-------|-------|-------|-------|-------|--------|-------|--------|-------|
| 0            | 0.242 | 0.515 | 0.241 | 0.512 | 0.244 | 0.247  | 0.238 | 0.421  | 0.226 |
| 46           | 0.378 | 1.138 | 0.59  | 1.266 | 0.791 | 0.808  | 0.967 | 1.186  | 0.49  |
